# Supplementary material
Source: PubMed Central journal article supplement (PMC4824677)

Supplementary Table 1. [Elements-Questions](#) related to menopause in the CLIMB Epidemiologic Survey.

| <b>Q7. Have your ovaries been surgically removed?</b>                                                                                          |                      | <input type="checkbox"/> ONE<br><input type="checkbox"/> BOTH          | <input type="checkbox"/> NO                                   | ____/____<br>(Month/Year)                                      | Reason:                                                     |                                      |                         |                                             |
|------------------------------------------------------------------------------------------------------------------------------------------------|----------------------|------------------------------------------------------------------------|---------------------------------------------------------------|----------------------------------------------------------------|-------------------------------------------------------------|--------------------------------------|-------------------------|---------------------------------------------|
| <b>Q8. Has your uterus been surgically removed?</b>                                                                                            |                      | <input type="checkbox"/> YES                                           | <input type="checkbox"/> NO                                   | ____/____<br>(Month/Year)                                      | Reason:                                                     |                                      |                         |                                             |
| <b>Q9. When was your last menstrual period?</b>                                                                                                |                      | ____/____<br>(Month / Year of last period)                             |                                                               |                                                                |                                                             |                                      |                         |                                             |
| <b>Q10. Do you think you have started menopause?</b>                                                                                           |                      | <input type="checkbox"/> YES                                           |                                                               | <input type="checkbox"/> NO<br><i>Please move to next page</i> |                                                             |                                      |                         |                                             |
| <b>Q11. Was the onset of menopause associated with the following?</b>                                                                          |                      | Radiation                                                              | <input type="checkbox"/> YES<br>Date of radiation ____/____   |                                                                | <input type="checkbox"/> NO                                 |                                      |                         |                                             |
|                                                                                                                                                |                      | Chemotherapy                                                           | <input type="checkbox"/> YES<br>Name: _____<br>Date ____/____ |                                                                | <input type="checkbox"/> NO                                 |                                      |                         |                                             |
| <b>Q12. When did you first experience symptoms of menopause?</b>                                                                               |                      | Hot flashes (month/year):                                              |                                                               |                                                                | ____/____                                                   |                                      |                         |                                             |
|                                                                                                                                                |                      | Irregular menstrual periods (month/year):                              |                                                               |                                                                | ____/____                                                   |                                      |                         |                                             |
| <b>Q12. Have you ever taken hormone replacement therapy (HRT) for menopausal symptoms? If YES, please fill in details below for each type.</b> |                      |                                                                        |                                                               | <input type="checkbox"/> YES                                   | <input type="checkbox"/> NO <i>Please move to next page</i> |                                      |                         |                                             |
| Hormone Therapy (HRT)                                                                                                                          | Brand Name (Fill in) | Route of administration (choose: gel, cream, patch, pill, suppository) |                                                               |                                                                |                                                             |                                      | Start date (Month/Year) | Stop Date (Enter "Current" if still taking) |
| Estrogen                                                                                                                                       |                      | <input type="checkbox"/> gel                                           | <input type="checkbox"/> cream                                | <input type="checkbox"/> patch                                 | <input type="checkbox"/> pill                               | <input type="checkbox"/> suppository | ____/____               | ____/____                                   |
| Estrogen+Progesterone                                                                                                                          |                      | <input type="checkbox"/> gel                                           | <input type="checkbox"/> cream                                | <input type="checkbox"/> patch                                 | <input type="checkbox"/> pill                               | <input type="checkbox"/> suppository | ____/____               | ____/____                                   |
| Testosterone                                                                                                                                   |                      | <input type="checkbox"/> gel                                           | <input type="checkbox"/> cream                                | <input type="checkbox"/> patch                                 | <input type="checkbox"/> pill                               | <input type="checkbox"/> suppository | ____/____               | ____/____                                   |
| Raloxifene (Evista)                                                                                                                            |                      | <input type="checkbox"/> gel                                           | <input type="checkbox"/> cream                                | <input type="checkbox"/> patch                                 | <input type="checkbox"/> pill                               | <input type="checkbox"/> suppository | ____/____               | ____/____                                   |
| Phytoestrogens (soy estrogens)                                                                                                                 |                      | <input type="checkbox"/> gel                                           | <input type="checkbox"/> cream                                | <input type="checkbox"/> patch                                 | <input type="checkbox"/> pill                               | <input type="checkbox"/> suppository | ____/____               | ____/____                                   |
| Black cohosh                                                                                                                                   |                      | <input type="checkbox"/> gel                                           | <input type="checkbox"/> cream                                | <input type="checkbox"/> patch                                 | <input type="checkbox"/> pill                               | <input type="checkbox"/> suppository | ____/____               | ____/____                                   |
| Other:                                                                                                                                         |                      | <input type="checkbox"/> gel                                           | <input type="checkbox"/> cream                                | <input type="checkbox"/> patch                                 | <input type="checkbox"/> pill                               | <input type="checkbox"/> suppository | ____/____               | ____/____                                   |

**Supplementary Table 2. Comparison of demographic and clinical characteristics between survey respondents and CLIMB subjects fulfilling study inclusion criteria who [chose not to, or](#) did not yet, complete the survey.**

|                                               | Completed survey              | Did not complete survey       | p-value |
|-----------------------------------------------|-------------------------------|-------------------------------|---------|
| N                                             | 724                           | 486                           |         |
| Age at last clinic visit (mean (SD))          | 49.3 (11.4)                   | 46.9 (11.8)                   | <0.001  |
| Age at first symptom (mean (SD))              | 33.7 (9.9)                    | 32.6 (10.1)                   | 0.052   |
| White (%)                                     | 93.0                          | 91.0                          | 0.23    |
| Hispanic (%)                                  | 3.6                           | 5.8                           | 0.087   |
| EDSS (median (range))                         | 2 (0, 9.5)                    | 2 (0, 9)                      | 0.89    |
| Disease category (%)<br>(CIS, RR, SP, PP, PR) | 4.6 / 77.1 / 14.2 / 3.0 / 1.1 | 4.1 / 77.0 / 15.4 / 2.3 / 1.2 | 0.89    |

At the time of the study (7/1/2014), 60% CLIMB subjects had completed the survey.

**Supplementary Table 3. Demographic and menopause characteristics of study subjects contributing to the primary inflection point analyses.**

|                                                                    | Natural menopause                              | Surgical menopause                            |
|--------------------------------------------------------------------|------------------------------------------------|-----------------------------------------------|
| N (% total in table)                                               | 101 (35.4)                                     | 23 (9.4)                                      |
| Age at last clinic visit, years (mean (SD))                        | 55.9 (4.7)                                     | 50.8 (4.5)                                    |
| Age at first symptom, years (mean (SD))                            | 38.3 (8.5)                                     | 33.7 (6.7)                                    |
| White (N (%))                                                      | 99 (98.0)                                      | 21 (91.3)                                     |
| Hispanic (N (%))                                                   | 1 (1.0)                                        | 1 (4.3)                                       |
| Disease category (CIS, RR, SP, PP, PR) (N (%))                     | 3, 80, 13, 2, 1<br>(3.0, 80.8, 13.1, 2.0, 1.0) | 0, 17, 5, 0, 1<br>(0.0, 73.9, 21.7, 0.0, 4.3) |
| EDSS at last clinic visit (mean, (SD))                             | 2.2 (2.0)                                      | 2.8 (2.4)                                     |
| Reported age at menopause, years (mean (SD))                       | 51.0 (4.1)                                     | 45.3 (5.6)                                    |
| Ever-use any form of HRT (N (%))                                   | 8 (8.2)                                        | 2 (14.3)                                      |
| Ever-use systemic E or E+P HRT within 3 years of menopause (N (%)) | 5 (5.2)                                        | 2 (14.3)                                      |
| <u>Follow-up time pre-menopause (mean (SD))</u>                    | <u>5.3 (3.2)</u>                               | <u>5.5 (3.6)</u>                              |
| <u>Follow-up time post menopause (mean (SD))</u>                   | <u>5.0 (3.1)</u>                               | <u>5.5 (3.3)</u>                              |

**Supplementary Table 4. Effect of Menopause on Patient-Reported Outcome Measures in a subset of 70 women followed prospectively through their menopausal transition.**

|                                 | Analysis 1: Inflection point analysis* (n=70) | Range               |
|---------------------------------|-----------------------------------------------|---------------------|
| SF-36: Physical functioning     | -0.23 (0.32)                                  | <u>(13.1, 56.8)</u> |
| SF-36: Role physical            | -0.53 (0.17)                                  | <u>(26.0, 55.6)</u> |
| SF-36: Bodily pain              | -0.073 (0.80)                                 | <u>(18.0, 60.4)</u> |
| SF-36: General health           | <b>-0.59 (0.017)</b>                          | <u>(19.1, 63.8)</u> |
| SF-36: Vitality                 | -0.048 (0.87)                                 | <u>(20.7, 68.7)</u> |
| SF-36: Social functioning       | -0.43 (0.11)                                  | <u>(12.6, 57.3)</u> |
| SF-36: Role emotional           | 0.026 (0.94)                                  | <u>(25.4, 55.7)</u> |
| SF-36: Mental health            | -0.26 (0.36)                                  | <u>(15.1, 64.0)</u> |
| SF-36: Physical composite score | -0.39 (0.15)                                  | <u>(13.7, 67.6)</u> |
| SF-36: Mental composite score   | -0.070 (0.80)                                 | <u>(16.5, 65.6)</u> |
| MFIS                            | <b>-0.96 (0.025)</b>                          | <u>(0, 84)</u>      |
| CES-D                           | 0.063 (0.78)                                  | <u>(20, 71)</u>     |

\*Estimated change in slope after menopause (p-value). Inflection point model included only random intercept and slope due to problems with estimation in model including random intercept, slope and change in slope.

← Formatted Table

Supplementary Figure 1. Reproductive Survey Completion Rates.

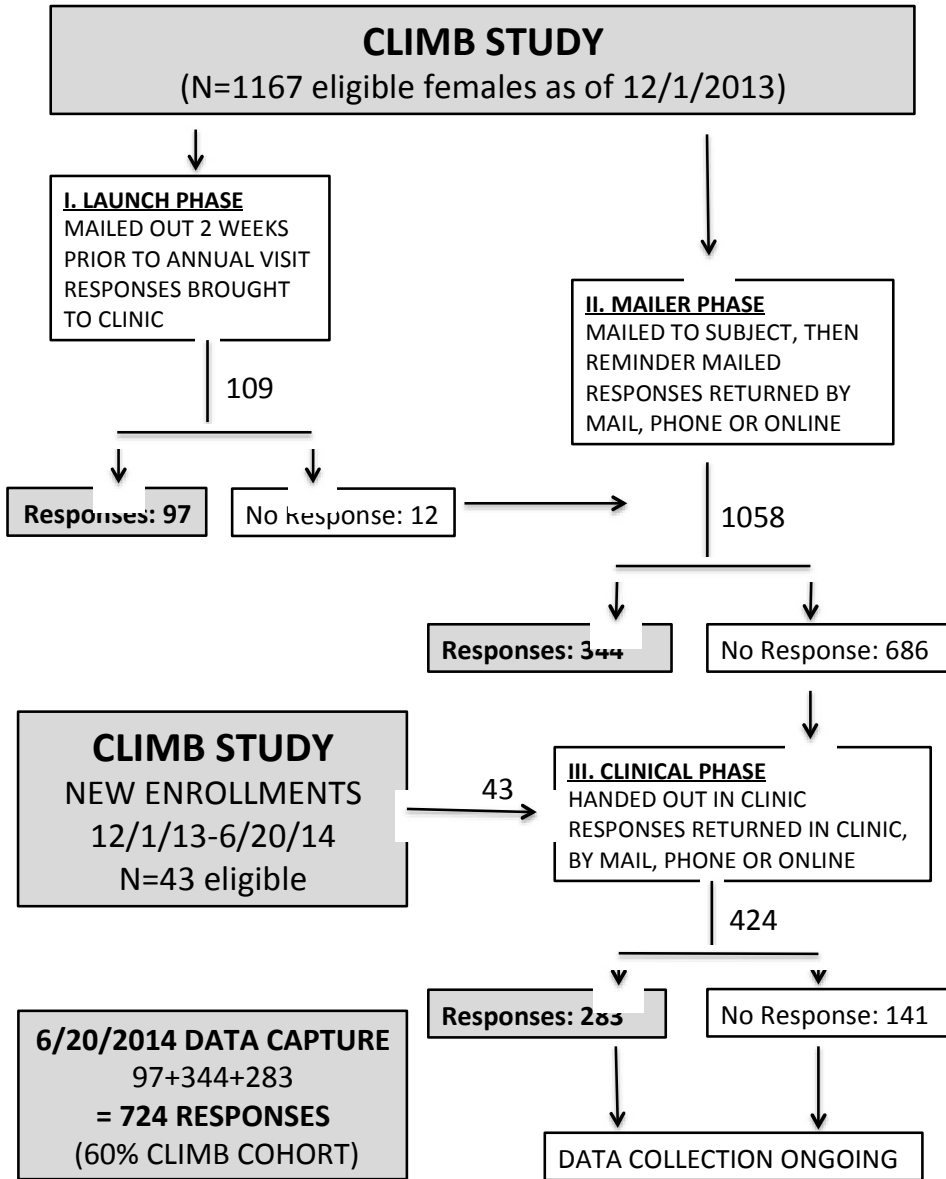

**Supplementary Figure 2. Distribution of Age at Natural Menopause in a large clinical cohort of women with MS.**

Legend: Kaplan-Meier curve depicting time to menopause in 668 subjects. Median age at last menstrual period is 51.5 years. A subset of postmenopausal subjects (n=56) did not provide a date for final menstrual period and thus did not contribute to this analysis.

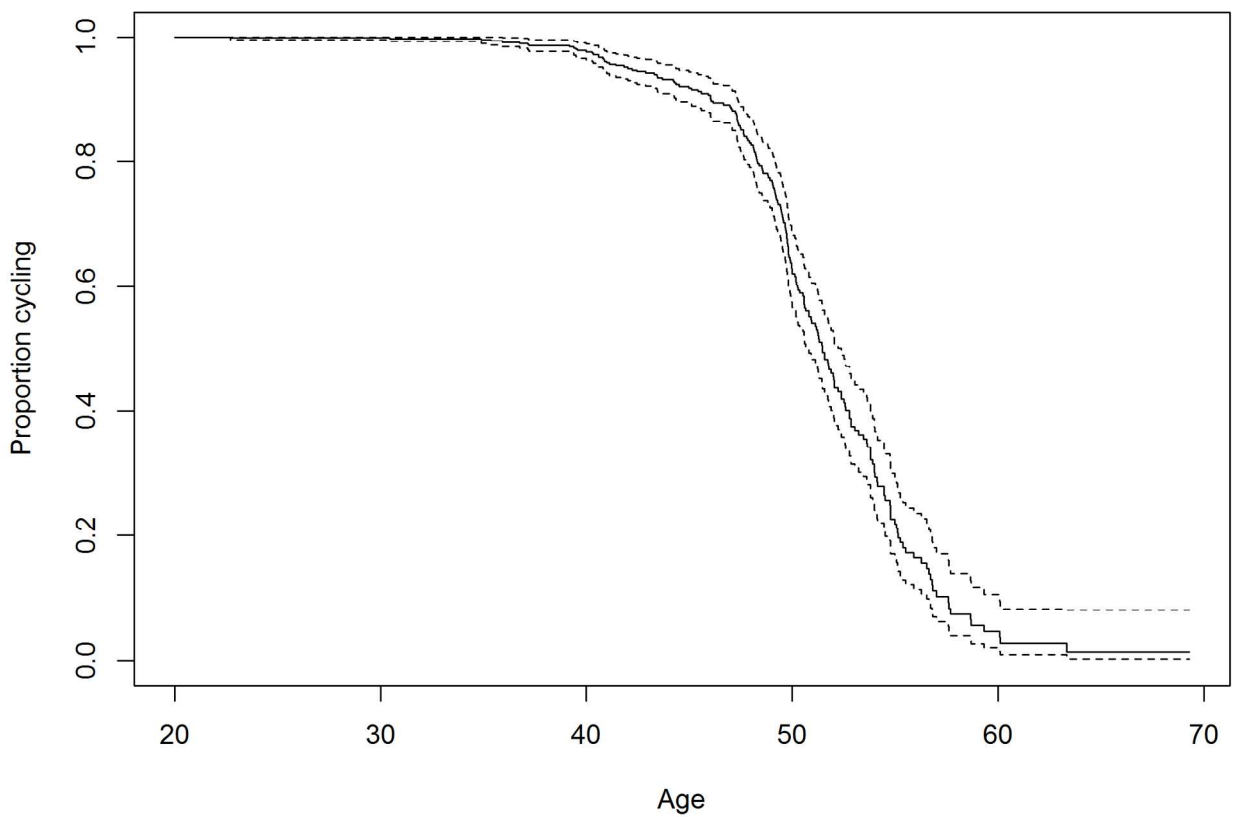

Supplement: NIHMS718998-supplement-01.pdf [file NIHMS718998-supplement-01.pdf]
